# Supplementary material
Source: PubMed Central journal article supplement (PMC8481097)
Supplement: mmc1.pdf [file mmc1.pdf]

Cell Reports, Volume 37

## Supplemental information

**The N-terminal domain of SARS-CoV-2 nsp1 plays key  
roles in suppression of cellular gene expression  
and preservation of viral gene expression**

**Aaron S. Mendez, Michael Ly, Angélica M. González-Sánchez, Ella Hartenian, Nicholas T. Ingolia, Jamie H. Cate, and Britt A. Glaunsinger**

Figure S1.

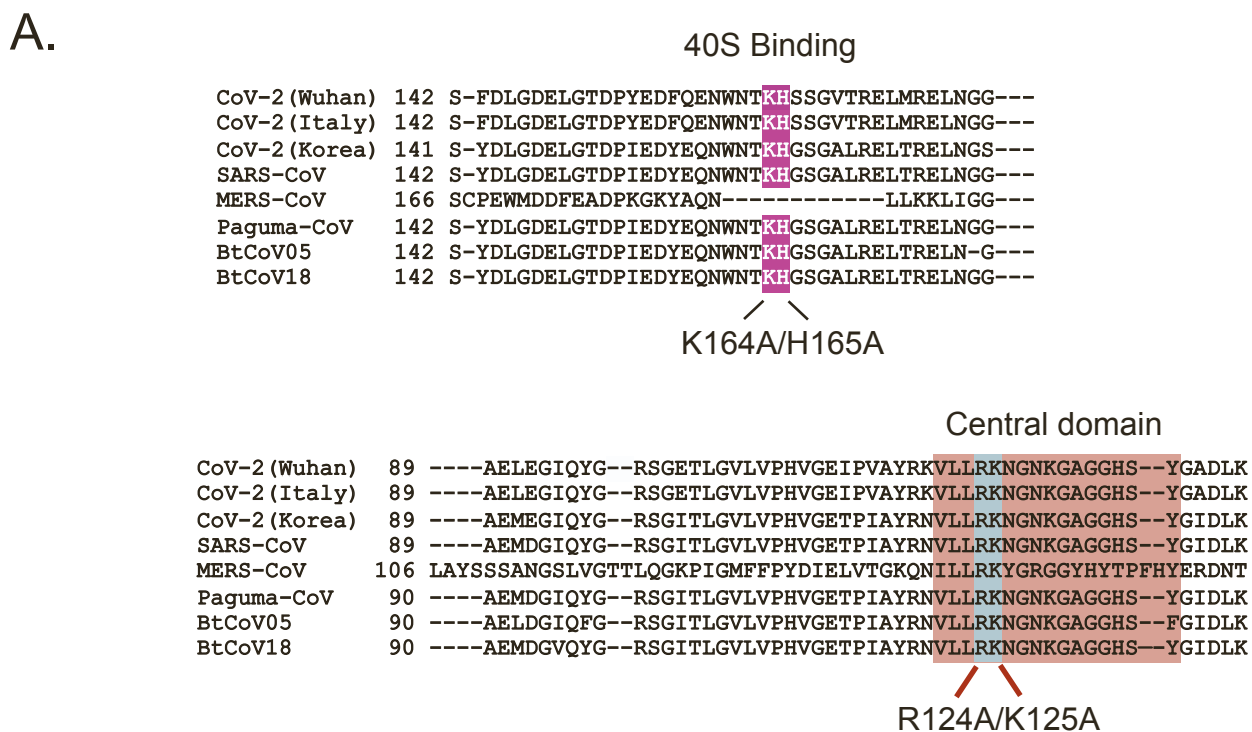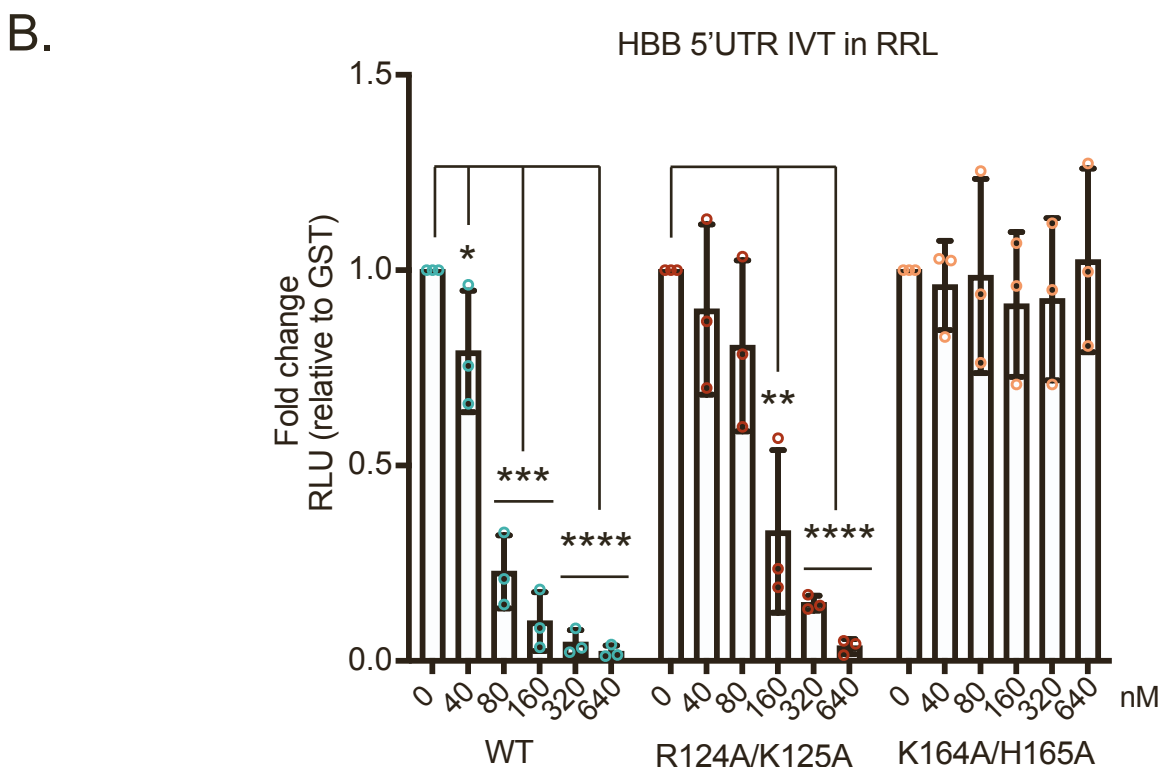

**Figure S1. Sequence alignment of the nsp1 C-terminal and central domains and RRL translation assay. Related to Figure 1.** (A) The purple box highlights conservation of the K164 and H165 residues and the red box shows the central domain containing conserved residues R124/K125 (blue) involved in mRNA destabilization across 8 betacoronavirus nsp1 proteins. (B) HBB-nLuc reporter RNA was incubated with rabbit reticulocyte lysate translation extracts alone or in the presence of increasing concentrations of purified WT, R124A/K125A or K164A/H165A nsp1. Translation of the reporter was then evaluated by luciferase assay and normalized to a GST protein control. Technical triplicates measurements were taken for each biological replicate. A total of at least three biological replicates were taken for each measurement. \* $P \leq 0.05$ , \*\* $P \leq 0.01$ , \*\*\* $P \leq 0.001$ , \*\*\*\* $P \leq 0.0001$ , one-sample t test versus hypothetical value of 1.

Figure S2.

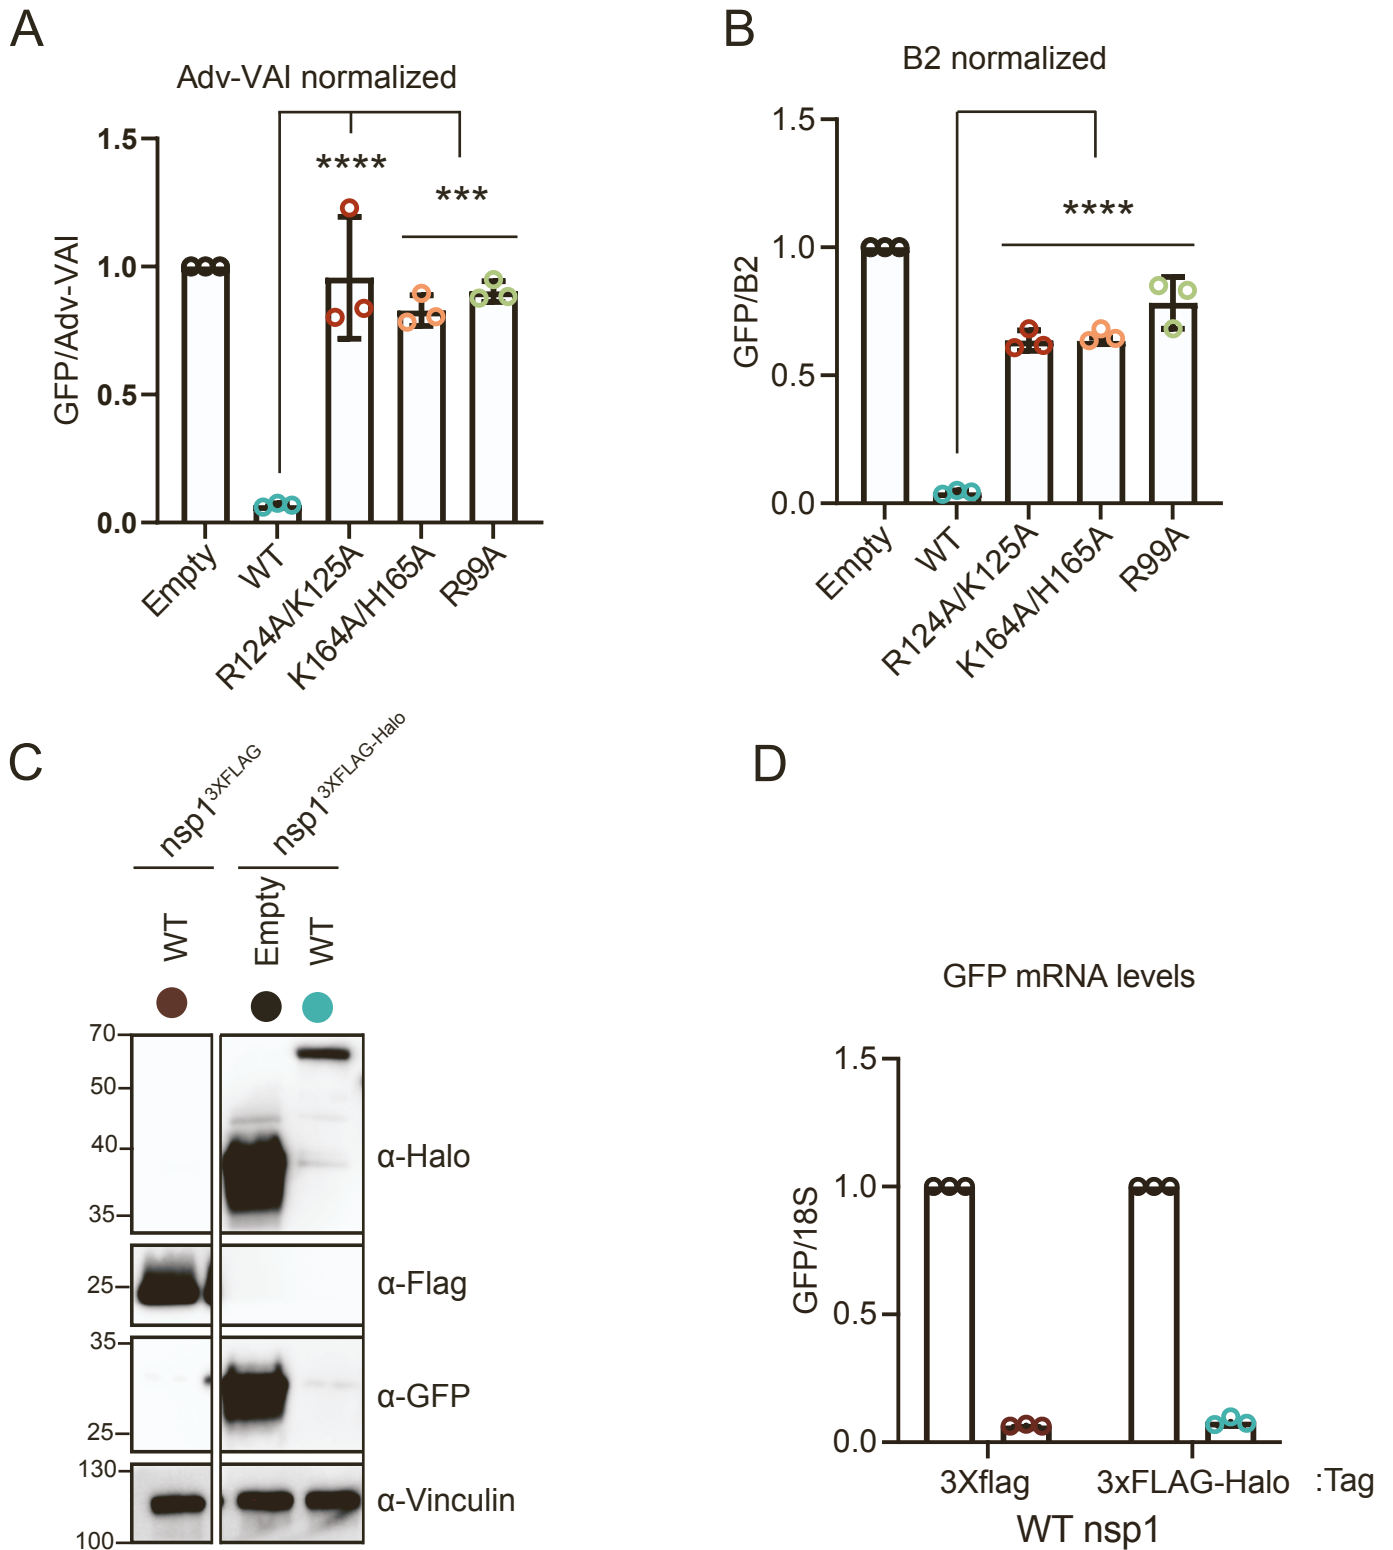

**Figure S2. Western blot and RT-qPCR analysis of tagged nsp1 and transfection control experiments. Related to Figures 1, 2 and 3.** (A-B) HEK293T cells were co-transfected for 24h with plasmids expressing GFP, WT or mutant nsp1 and either the Pol III transcribed Adenovirus (Adv)-VAI (A) or B2 SINE (B) transfection controls. GFP mRNA was quantified by RT-qPCR and normalized to Adv-VAI RNA, with the level of GFP mRNA in cells lacking nsp1 then set to 1. Each point represents an independent experiment, and a total of three biological replicates were completed for each sample. \*\*\* $P \leq 0.001$ , \*\*\*\* $P \leq 0.0001$ , one-way ANOVA followed by Dunnett's multiple comparisons test versus WT nsp1. (C-D) HEK293T cells were co-transfected with plasmids expressing GFP and either nsp1-3XFLAG or nsp1-3XFLAG-Halo and lysates were harvested for either protein (C) or RNA (D). Protein levels were measured by western blotting with antibodies against FLAG or Halo to detect nsp1 and antibodies against GFP as a marker of nsp1 host shutoff activity. Solid lines indicate lines cropped from the same gel. Vinculin was used as a loading control. GFP mRNA levels were determined by RT-qPCR and normalized to 18S rRNA, with the level of GFP mRNA in cells lacking nsp1 then set to 1. Each point represents an independent experiment, and a total of three biological replicates were completed for each sample.

Figure S3.

A.

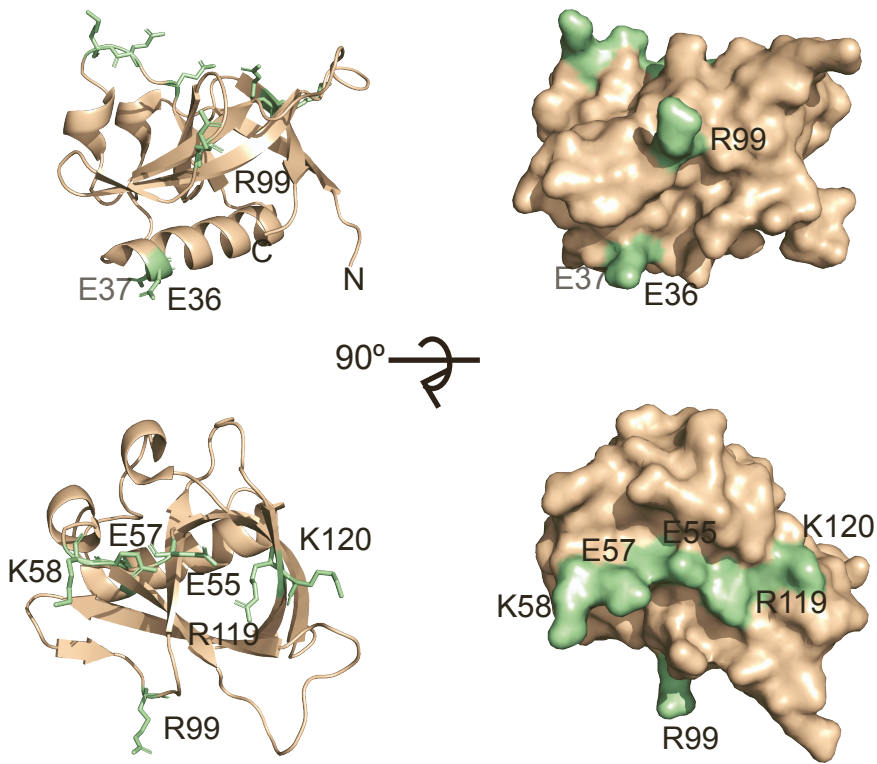

B.

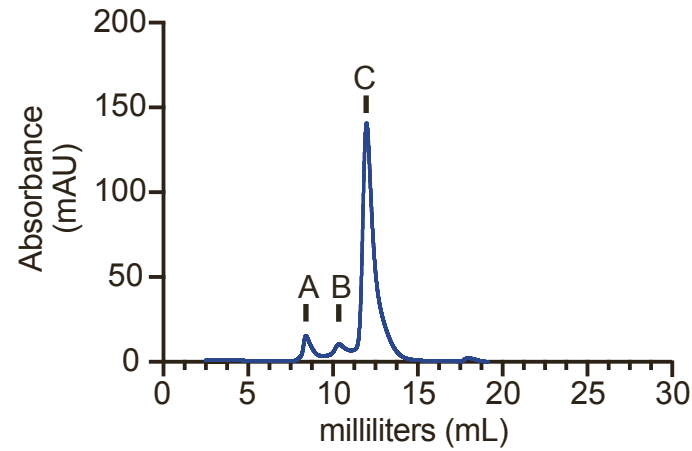

C.

HBB 5'UTR IVT in HEK293T lysate

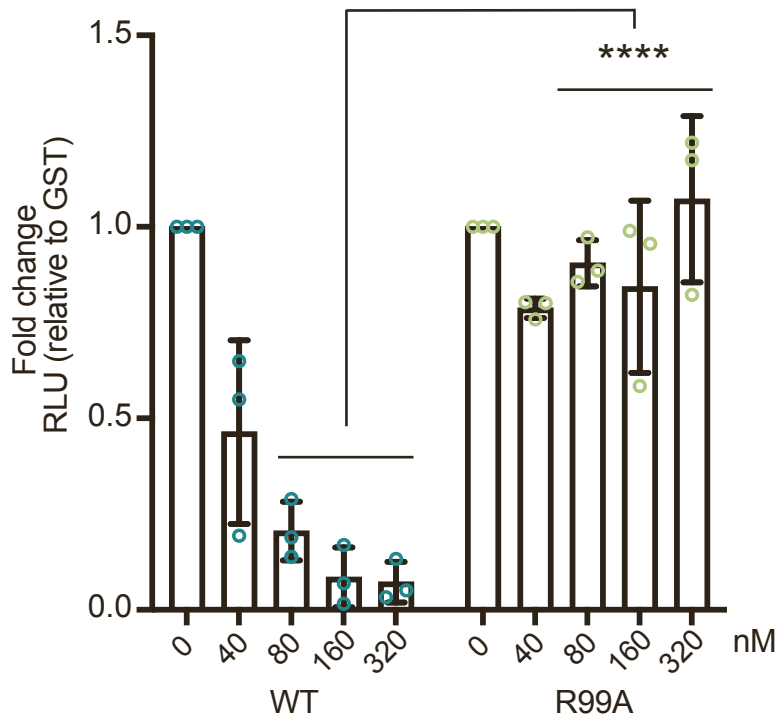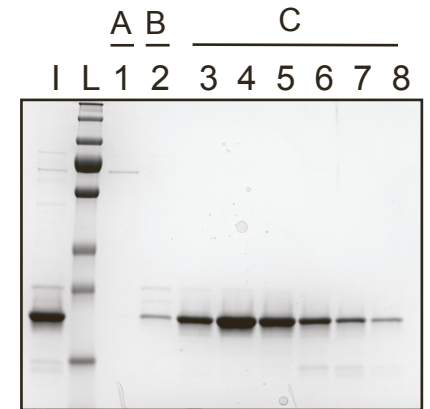

**Figure S3. Mutations to the N-terminal globular domain of nsp1. Related to Figure 3.** (A) Structure of the nsp1 N-terminal domain (PDB: 7K7P) (Clark et al. 2021). Residues selected for mutation are highlighted in green. (B) Size exclusion run of the purified nsp1 R99A protein. (I) indicates input sample and peaks A and B represent higher molecular weight contaminants. Peak C corresponds to the expected molecular weight of the nsp1 R99A mutant. (L) corresponds to the prestained ladder. (C) HEK293T translation extracts were used to monitor the effect of increasing concentrations of WT nsp1 versus the R99A mutant on translation of HBB-nLuc reporter, as measured by luciferase assay. Technical triplicates measurements were taken for each biological replicate. A total of at least three biological replicates were taken for each measurement. \*\*\*\* $P < 0.0001$ , one-way ANOVA followed by Dunnett's multiple comparisons test versus WT nsp1.



Figure S4.

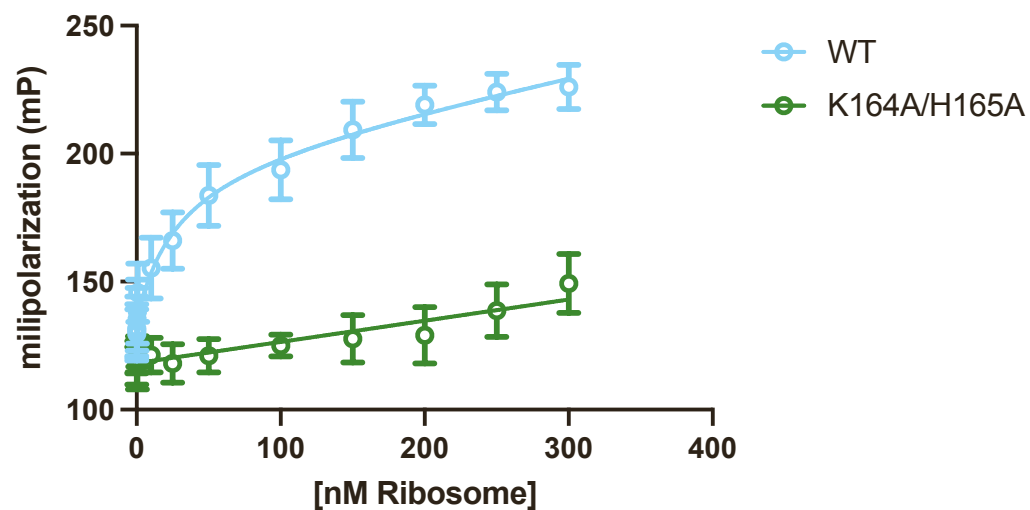

**Figure S4. Equilibrium binding of fluorescently labeled K164A/H165A nsp1. Related to Figure 4.** Binding experiments were performed with nsp1 WT (blue circles) and K164A /H165A (green circles) and purified ribosomes. Raw millipolarization units are shown on the Y axis (mP). Technical triplicates measurements were taken for each biological replicate. A total of at least three biological replicates were taken for each measurement.

Figure S5.

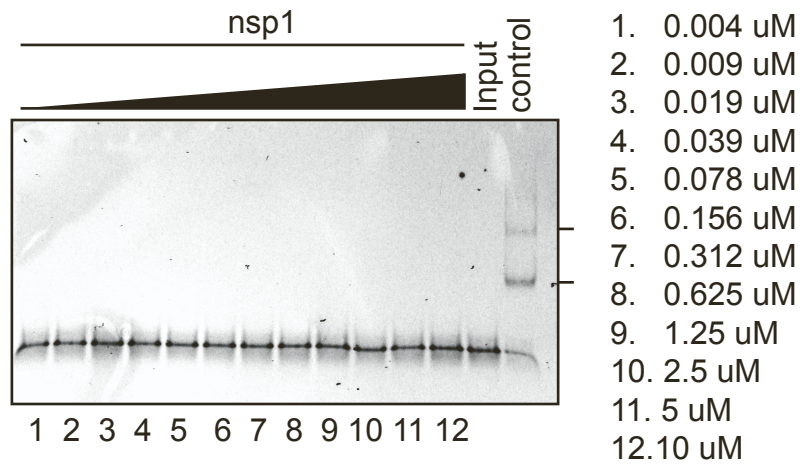

**Figure S5. Nsp1 does not directly bind CoV2 leader RNA. Related to Figure 4.** To test for direct nsp1-RNA binding, an electrophoretic mobility shift assay was conducted by incubating increasing amounts of purified nsp1 protein (0.004-10uM) with 5' Cy5 labeled SARS-CoV-2 leader RNA for 30 min. The Kaposi's associated sarcoma herpesvirus RNA binding protein ORF37 (5uM) was included as a control to show RNA binding under these conditions.

Figure S6.

A.

RIP for HBB-nLuc

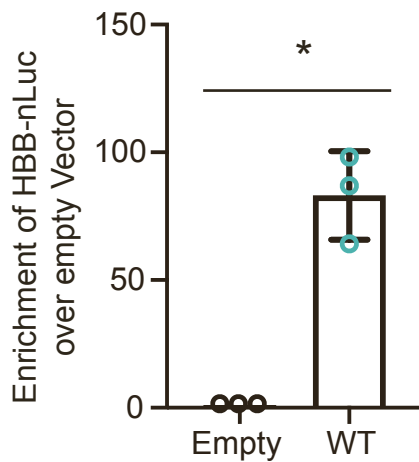

B.

RIP for 18S RNA

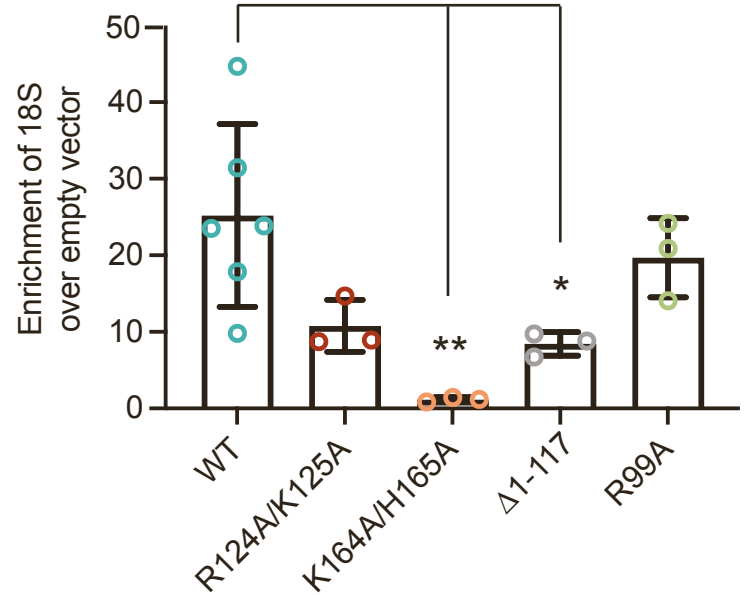

C.

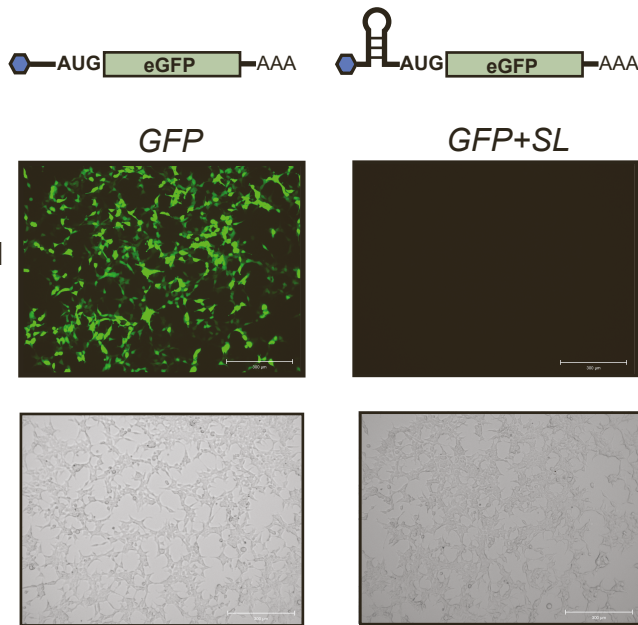

D.

RIP for CoV2-nLuc

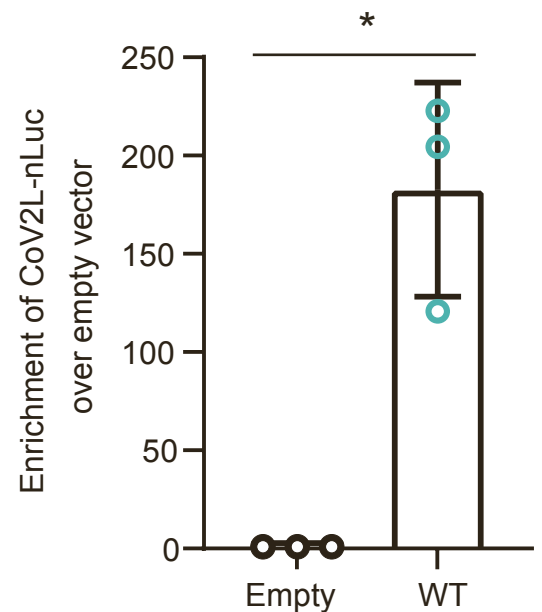

**Figure S6. Binding of reporter mRNAs and 18S rRNA to WT and/or mutant nsp1. Related to Figures 4 and 5.** (A) RIP data showing the enrichment value of HBB-nLuc mRNA for WT nsp1 compared to empty vector, using the data from the experiments in Figure 4C. Each point represents an independent experiment, and a total of three biological replicates were completed for each sample. \* $P \leq 0.05$ , one-sample t test versus hypothetical value of 1. (B) RT-qPCR was performed to quantify 18S levels in the RIP experiment shown in Figure 4C, with the RNA values then normalized to the RNA values obtained from the empty vector control. Each point represents an independent experiment, and a total of at least three biological replicates were completed for each sample. \* $P \leq 0.05$ , \*\* $P \leq 0.01$ , one-way ANOVA followed by Dunnett's multiple comparisons test versus WT nsp1. (C) Plasmids encoding GFP mRNA or GFP mRNA containing a cap-proximal stem loop structure (*GFP+SL*) were transfected into HEK293T cells, and GFP fluorescence from each cell was assessed by fluorescence microscopy. Bright field images show cell density; all images were taken at 10X magnification. (D) RIP data showing the enrichment value of CoV2L-nLuc mRNA for WT nsp1 compared to empty vector, using the data from the experiments in Figure 5B. Each point represents an independent experiment, and a total of three biological replicates were completed for each sample. \* $P \leq 0.05$ , one-sample t test versus hypothetical value of 1.

**Supplemental Table 1. Oligos used in this study. Related to STAR Methods.**

| <b>RT-qPCR primers</b>         |                                             |                                                                                                              |
|--------------------------------|---------------------------------------------|--------------------------------------------------------------------------------------------------------------|
| Target gene                    | Forward primer                              | Reverse primer                                                                                               |
| GFP                            | GAACCGCATCGAGCTGAA                          | TGCTTGTCTGGCCATGATAG                                                                                         |
| Nanoluciferase                 | GGAGGTGTGTCCAGTTTGT                         | ATGTCGATCTTCAGCCCA<br>TTT                                                                                    |
| 18S                            | GTAACCCGTTGAACCCCAT                         | CCATCCAATCGGTAGTAG<br>CG                                                                                     |
| Adv-VAI                        | TGGTCTGGTGGATAAATTCG                        | GTTGTCTGACGTCGCAC<br>A                                                                                       |
| B2 SINE                        | GGGGCTGGAGAGATGGCT                          | CCATGTGGTTGCTGGGA<br>T                                                                                       |
| <b>Primer extension oligo</b>  |                                             |                                                                                                              |
| Target gene                    | Sequence                                    |                                                                                                              |
| Nanoluciferase                 | CGCCAGAATGCGTTCGCAC<br>AGCCGCCAGCCGGTC      |                                                                                                              |
| <b>Oligos used for cloning</b> |                                             |                                                                                                              |
| Name                           | Sequence                                    | Description                                                                                                  |
| pGEX-CoV2nsp1_Fw               | GGATCCCCAGGAATTGAGAGCC<br>TTGTCCCTGGTTTC    | Forward primer to amplify CoV-2 nsp1 and clone into pGEX vector via InFusion reaction for protein expression |
| pGEX-CoV2nsp1_Rv               | AGTCACGATGCGGCCTTACCCTC<br>CGTTAAGCTCACGC   | Reverse primer to amplify CoV-2 nsp1 and clone into pGEX vector via InFusion reaction for protein expression |
| pCDNA4-3xFLAG-HaloTEV-CoV2_Fw  | GACAAGGGGGCGGCCGAGAA<br>ATCGGTAAGCTTTCC     | Forward primer to amplify CoV-2 nsp1 and generate N-terminally 3xFLAG-HaloTEV nsp1 via InFusion reaction     |
| pCDNA4-3xFLAG-HaloTEV-CoV2_Rv  | TAGACTCGAGCGCCCTACCCTC<br>CGTTAAGCTCACGC    | Reverse primer to amplify CoV-2 nsp1 and generate N-terminally 3xFLAG-HaloTEV nsp1 via InFusion reaction     |
| pCDNA4-CoV2-FLAG_Fw            | CACAGTGGCGGCCGCATGG<br>AGAGCCTTGTCCCTGGTTTC | Forward primer to amplify CoV-2 nsp1 and generate C-terminally 3xFLAG tagged                                 |

|                                 |                                                        |                                                                                                                            |
|---------------------------------|--------------------------------------------------------|----------------------------------------------------------------------------------------------------------------------------|
|                                 |                                                        | nsp1 via restriction enzyme cloning                                                                                        |
| pCDNA4-CoV2-FLAG_Rv             | CTCGAGCGGCCGCCACCCT<br>CCGTTAAGCTCACGCATGAG            | Reverse primer to amplify CoV-2 nsp1 and generate C-terminally 3xFLAG tagged nsp1 via restriction enzyme cloning           |
| pCDNA4-CoV2-delta118-<br>180_Fw | GACAAGGGGGCGGCCGCAGAA<br>ATCGGTACTGGCTTTCC             | Forward primer to amplify the N-terminal half of CoV-2 nsp1 and generate CoV-2 nsp1 $\Delta$ 118-180 via InFusion reaction |
| pCDNA4-CoV2-delta118-<br>180_Rv | TAGACTCGAGCGGCCCTAAGCC<br>ACTGGTATTTGCCCC              | Reverse primer to amplify the N-terminal half of CoV-2 nsp1 and generate CoV-2 nsp1 $\Delta$ 118-180 via InFusion reaction |
| pCDNA4-CoV2-delta1-<br>117_Fw   | GACAAGGGGGCGGCCGCAGAA<br>ATCGGTACTGGCTTTCC             | Forward primer to amplify the C-terminal half of CoV-2 nsp1 and generate CoV-2 nsp1 $\Delta$ 1-117 via InFusion reaction   |
| pCDNA4-CoV2-delta1-<br>117_Rv   | TAGACTCGAGCGGCCCTACCCTC<br>CGTTAAGCTCACG               | Reverse primer to amplify the C-terminal half of CoV-2 nsp1 and generate CoV-2 nsp1 $\Delta$ 1-117 via InFusion reaction   |
| CoV-2 nsp1 R124A/K125A          | CGCAAGGTTCTTCTTGCTGC<br>GAACGGTAATAAAGGA               | Mutagenesis primers to generate R124A/K125A mutant                                                                         |
| CoV-2 nsp1 K164A/H165A          | GAAAACTGGAACACTGCAG<br>CTAGCAGTGGTGTTACC               | Mutagenesis primers to generate K164A/H165A mutant                                                                         |
| CoV-2 nsp1 E36A/E37A            | GGCTTTGGAGACTCCGTGGCAG<br>CAGTCTTATCAGAGGCAC           | Mutagenesis primers to generate E36A/E37A mutant                                                                           |
| CoV-2 nsp1<br>E55A/E57A/K58A    | GGCACTTGTGGCTTAGTAGCAG<br>TTGCAGCGGGCGTTTTGCCTCAA<br>C | Mutagenesis primers to generate E55A/E57A/K58A mutant                                                                      |
| CoV-2 nsp1 R99A                 | CGAAGGCATTAGTACGGTGCA<br>AGTGGTGAGACACTTGG             | Mutagenesis primers to generate R99A mutant                                                                                |
| CoV-2 nsp1 R119A/K120A          | GAAATACCAGTGGCTTACGCAG<br>CGGTTCTTCTTCGTAAGAAC         | Mutagenesis primers to generate R119A/K120A mutant                                                                         |
| CoV-2 nsp1 $\Delta$ 122-130     | CAGTGGCTTACCGCAAGGTTGCT<br>GGTGGCCATAGTTACG            | Mutagenesis primers to generate $\Delta$ 122-130 mutant                                                                    |

|                                          |                                                                                                                                                                                                                                                                                                                                                                                                                                                                                                                                                                                                                                                                                                                                                 |                                                                                                |
|------------------------------------------|-------------------------------------------------------------------------------------------------------------------------------------------------------------------------------------------------------------------------------------------------------------------------------------------------------------------------------------------------------------------------------------------------------------------------------------------------------------------------------------------------------------------------------------------------------------------------------------------------------------------------------------------------------------------------------------------------------------------------------------------------|------------------------------------------------------------------------------------------------|
| CoV-2 nsp1 G-linker                      | CAGTGGCTTACCGCAAGGTTGG<br>AGGAGGAGGAAGCGGAGGAGG<br>AGGAGCTGGTGGCCATAGTTAC<br>G                                                                                                                                                                                                                                                                                                                                                                                                                                                                                                                                                                                                                                                                  | Mutagenesis primers to insert Glycine linker into the central domain                           |
| N-terminal cysteine/lysine<br>CoV-2 nsp1 | GAAGTTCTGTTCCAGGGGCCCT<br>GTAAAGAGAGCCTTGTCCTGG                                                                                                                                                                                                                                                                                                                                                                                                                                                                                                                                                                                                                                                                                                 | Primers used to add cysteine and lysine to CoV-2 nsp1 for fluorescence polarization            |
| pJP-HBB-nLuc_Fw                          | GTCAGATCCGCTAGCGCTA<br>CATTGCTTCTGAC                                                                                                                                                                                                                                                                                                                                                                                                                                                                                                                                                                                                                                                                                                            | Forward primer to amplify HBB-nLuc and clone into pJP vector via InFusion reaction             |
| pJP-HBB-nLuc_Rv                          | TTCTCTAGAGATATCTTAC<br>GCCAGAATGCGTTCGCA                                                                                                                                                                                                                                                                                                                                                                                                                                                                                                                                                                                                                                                                                                        | Reverse primer to amplify HBB-nLuc and clone into pJP vector via InFusion reaction             |
| CoV-2 leader geneblock                   | AAATGGACTATCATATGCC<br>AAGTACGCCCCCTATTGAC<br>GTCAATGACGGTAAATGGC<br>CCGCCTGGCATTATGCCCA<br>GTACATGACCTTATGGGAC<br>TTTCCTACTTGGCAGTACA<br>TCTACGTATTAGTCATCGC<br>TATTACCATGGTGATGCGG<br>TTTTGGCAGTACATCAATG<br>GGCGTGGATAGCGGTTTG<br>ACTCACGGGGATTTCGAAG<br>TCTCCACCCCATTGACGTC<br>AATGGGAGTTTGTGGC<br>ACCAAATCAACGGGACTT<br>TCCAAAATGTCGTAACAAC<br>TCCGCCCCATTGACGCAAA<br>TGGGCGGTAGGCGTGAC<br>GGTGGGAGGTCTATATAAG<br>CAGAGCTGGTTTAGTGAAC<br>CGACCTCCAGGTAACAA<br>ACCAACCAACTTTCGATCT<br>CTTGTAGATCTGTTCTCTAA<br>ACGAACATGGTCTTCACAC<br>TCGAAGATTTGTTGGGGA<br>CTGGCGACAGACAGCCGG<br>CTACAACCTGGACCAAGTC<br>CTTGAACAGGGAGGTGTGT<br>CCAGTTTGTTCAGAATCT<br>CGGGGTGTCCGTAACCTC<br>GATCCAAAGGATTGTCCTG<br>AGCGGTGAAAATGGGCTG<br>AAGATCGACATCCATGTCA | CoV-2 leader geneblock was synthesized by IDT and cloned into pJP vector via InFusion reaction |

|                        |                                                                                                                                                                                                                                                                                                                                                                                                                                       |                                                                         |
|------------------------|---------------------------------------------------------------------------------------------------------------------------------------------------------------------------------------------------------------------------------------------------------------------------------------------------------------------------------------------------------------------------------------------------------------------------------------|-------------------------------------------------------------------------|
|                        | TCATCCCGTATGAAGGTCT<br>GAGCGGCGACCAAATGGG<br>CCAGATCGAAAAATTTTAA<br>AGGTGGTGTACCCTGTGG<br>ATGATCATCACTTTAAGGT<br>GATCCTGCACTATGGCACA<br>CTGGTAATCGACGGGGTTA<br>CGCCGAACATGATCGACTA<br>TTTCGGACGGCCGTATGAA<br>GGCATCGCCGTGTTGAC<br>GGCAAAAAGATCACTGTAA<br>CAGGGACCCTGTGGAACG<br>GCAACAAAATTATCGACGA<br>GCGCCTGATCAACCCCGA<br>CGGCTCCCTGCTGTTCCGA<br>GTAACCATCAACGGAGTGA<br>CCGGCTGGCGGCTGTGCG<br>AACGCATTCTGGCGTAGGA<br>ATTCTCGACCTCGA |                                                                         |
| T7+HBB5'UTR+Koz+Nluc_F | TAATACGACTCACTATAGGA<br>CATTGCTTCTGACACA<br>GTGTTCACTAGCAACCTCAA<br>ACAGACACCGCCACCATGG<br>TCTTC                                                                                                                                                                                                                                                                                                                                      | Forward primer to generate HBB-nLuc template for in-vitro transcription |
| NLuc_R_60T             | TTTTTTTTTTTTTTTTTTTTTTT<br>TTTTTTTTTTTTTTTTTTTTTTT<br>TTTTTTTTTTTTTTTTTTTACGC<br>CAGAATGCGTTCGCAC                                                                                                                                                                                                                                                                                                                                     | Reverse primer to generate HBB-nLuc template for in-vitro transcription |
